# Supplementary material
Source: PubMed Central journal article supplement (PMC11368397)
Supplement: Supplementary_material-Suppl.1-s1.pdf [file Supplementary_material-Suppl.1-s1.pdf]

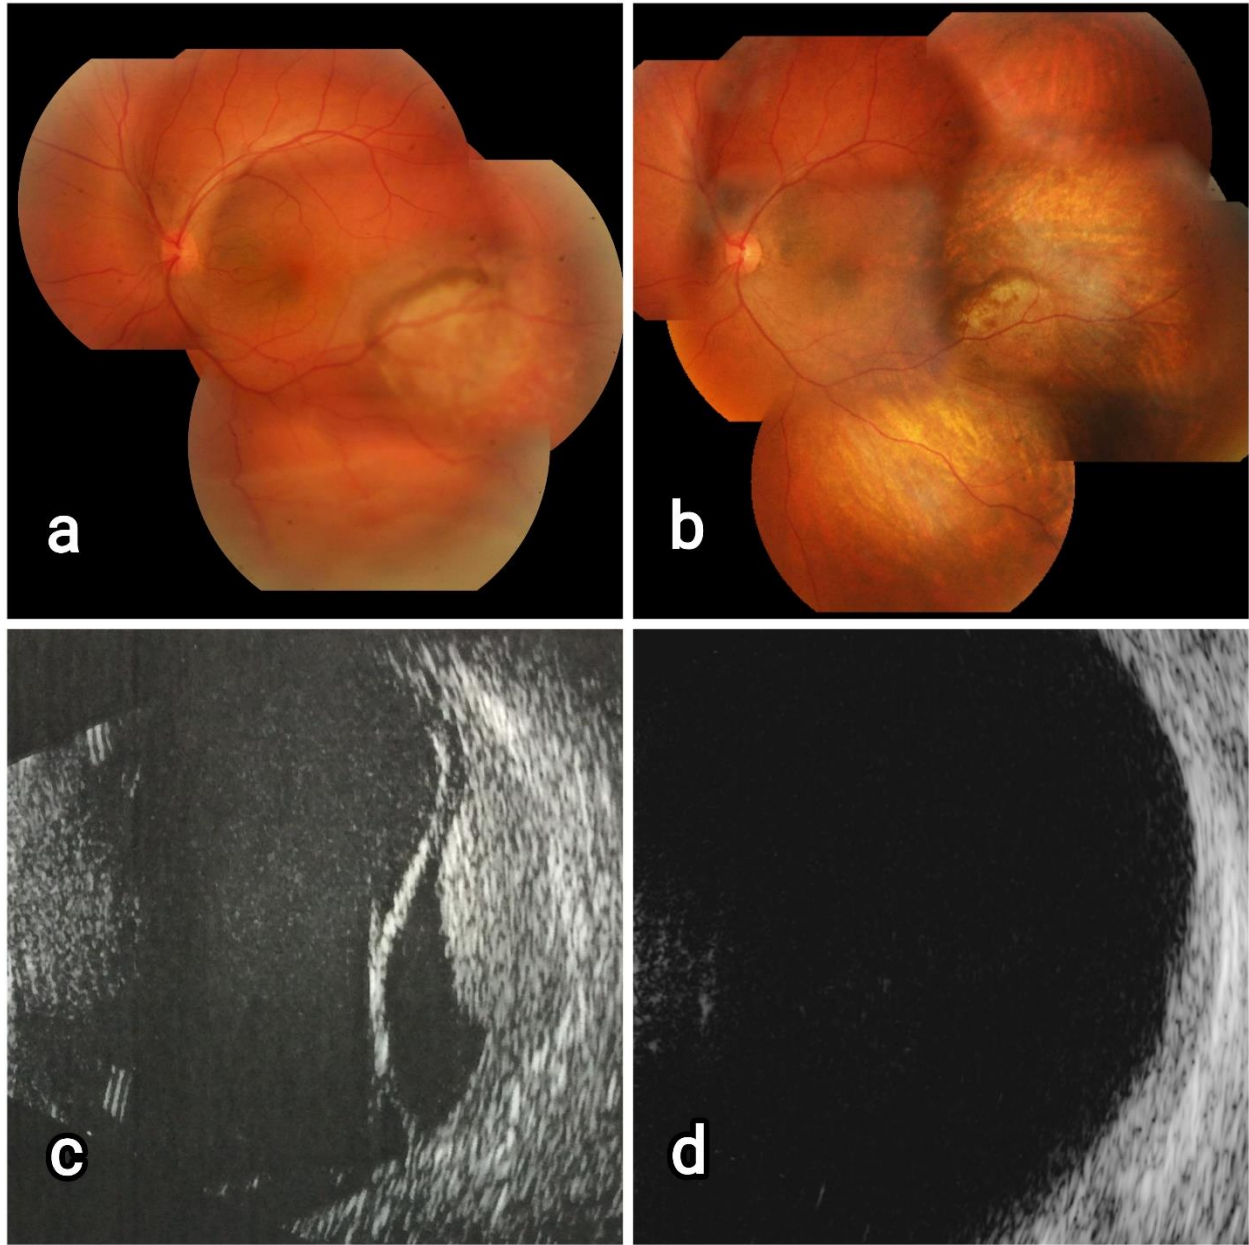

**Supplementary Figure 1.** Treatment outcome of ruthenium-106 brachytherapy in case 2 with left lower temporal circumscribed choroidal hemangioma (CCH): **a**, Preoperative colored fundus photograph of the left eye showing a CCH at the lower temporal arcade with associated exudative retinal detachment. **b**, Postoperative colored fundus photograph of the left eye showing flattening and scarring of the CCH and resolution of the exudative detachment after brachytherapy. **c**, Preoperative B scan ultrasonography showing a dome shaped choroidal lesion with high internal reflectivity and overlying exudative retinal detachment. **d**, Postoperative B scan ultrasonography showing flattening of the lesion and resolution of the exudative detachment after brachytherapy.
