# Supplementary material
Source: PubMed Central journal article supplement (PMC11368397)
Supplement: Supplementary_material-Suppl.2-s2.pdf [file Supplementary_material-Suppl.2-s2.pdf]

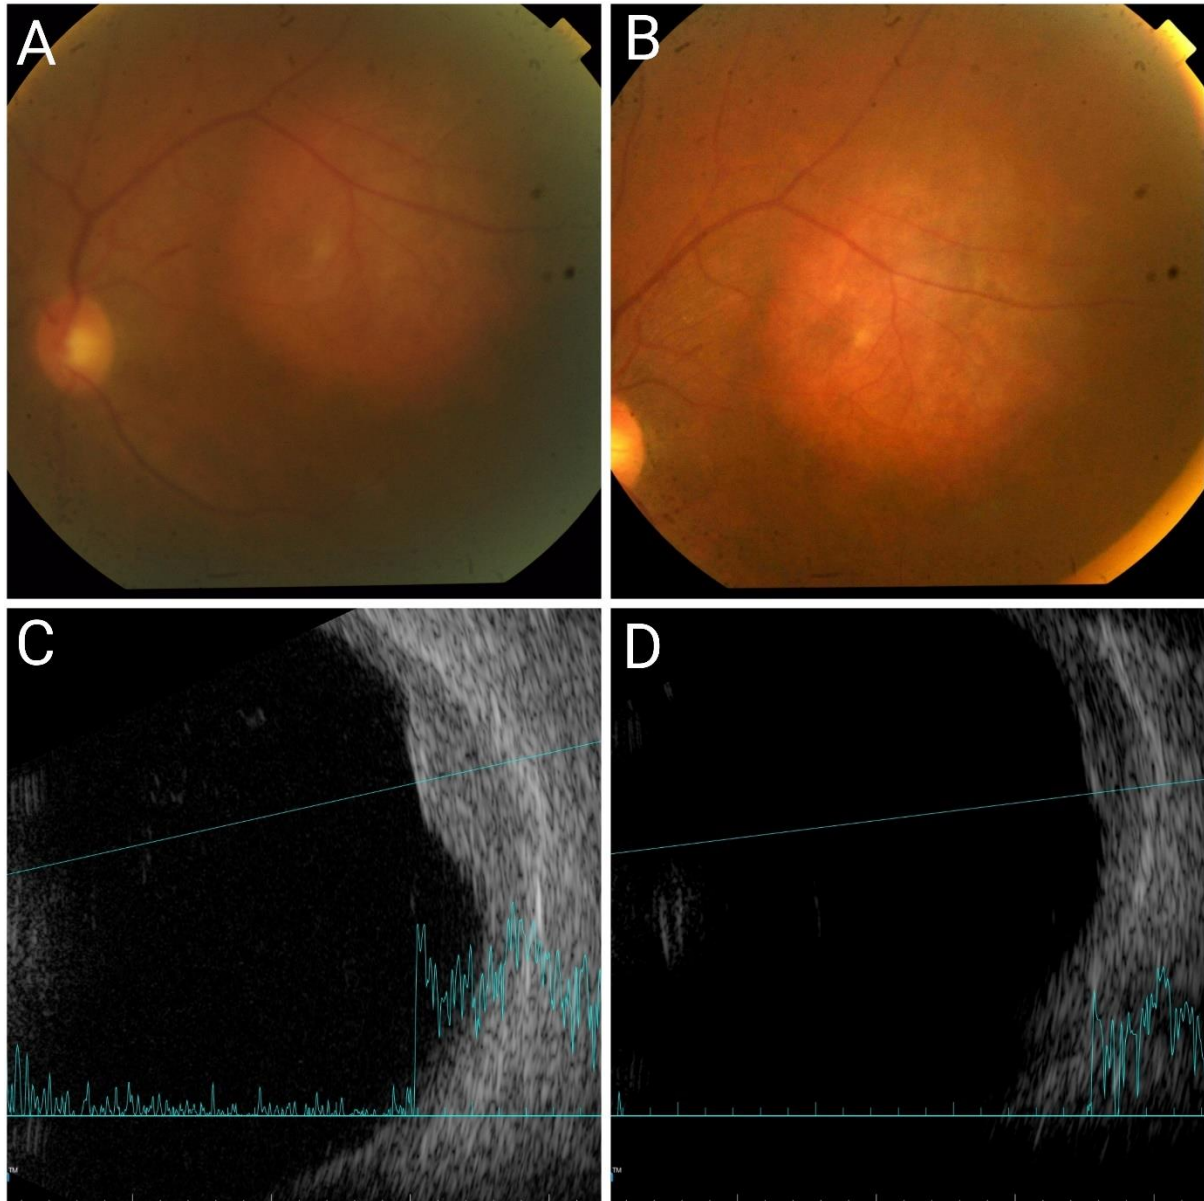

**Supplementary Figure 2.** Treatment outcome of ruthenium-106 brachytherapy in case 3 with macular circumscribed choroidal hemangioma (CCH): A, Preoperative colored fundus photograph of the left eye showing a macular CCH. B, Postoperative colored fundus photograph of the left eye showing flattening and scarring of the CCH after brachytherapy. C, Preoperative A and B scan ultrasonography showing a dome shaped choroidal lesion with high internal reflectivity. D, Postoperative A and B scan ultrasonography showing reduction in lesion height and base diameter after brachytherapy.
