# Supplementary material
Source: PubMed Central journal article supplement (PMC11368397)
Supplement: Supplementary_material-Suppl.3-s3.pdf [file Supplementary_material-Suppl.3-s3.pdf]

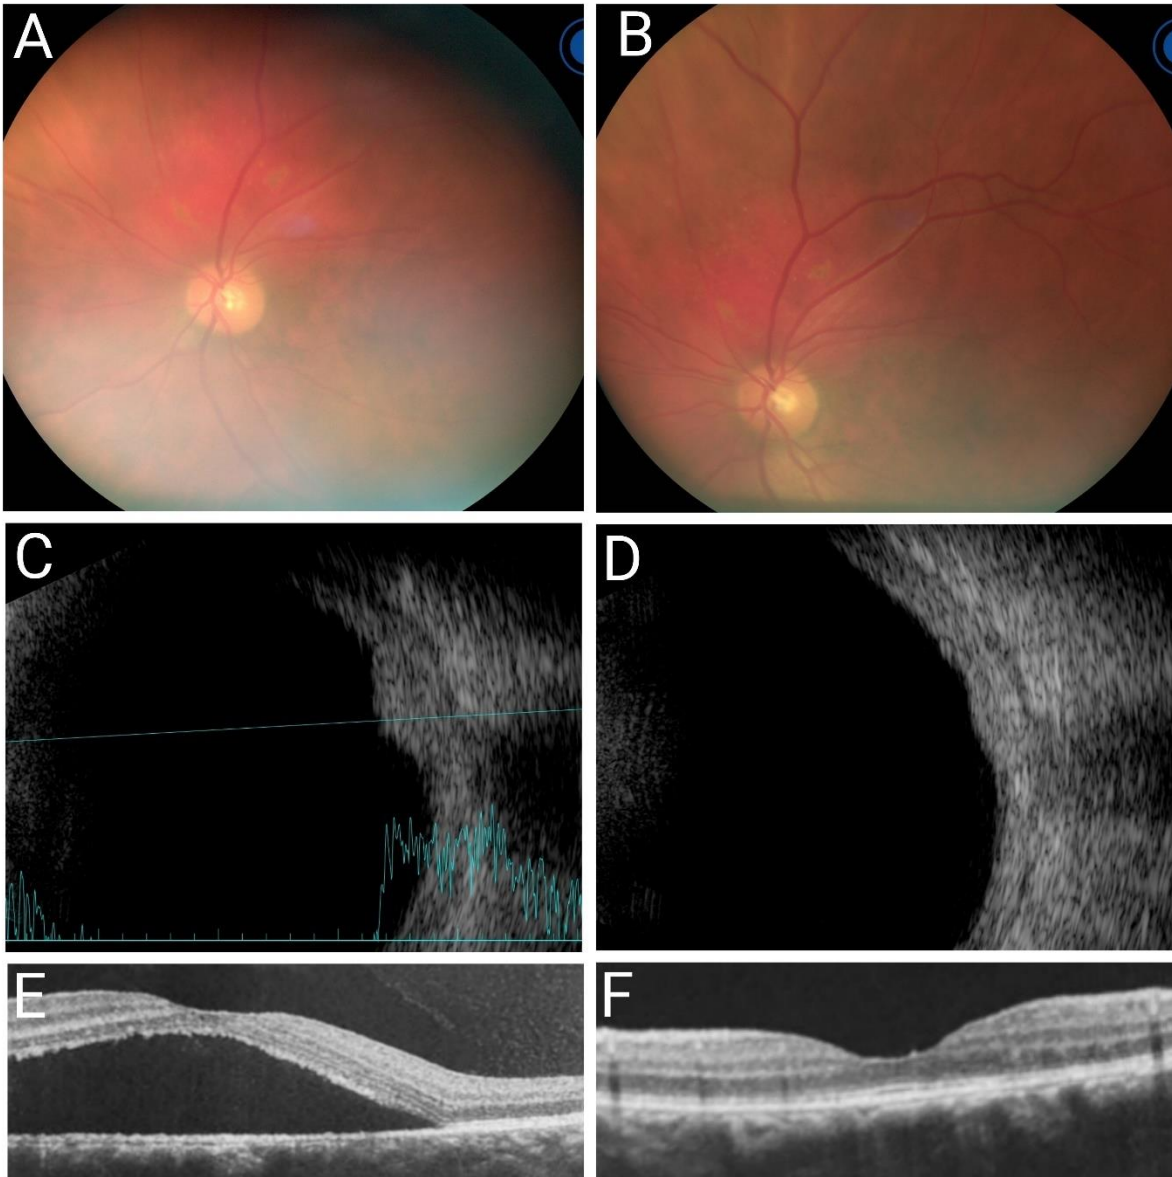

**Supplementary Figure 3.** Treatment outcome of ruthenium-106 brachytherapy in case 6 with left upper juxtapapillary circumscribed choroidal hemangioma (CCH): A, Preoperative colored fundus photograph of the left eye showing a CCH superior to the disc with associated exudative retinal detachment. B, Postoperative colored fundus photograph of the left eye showing flattening and scarring of the CCH with resolution of the exudative detachment after brachytherapy. C, Preoperative A and B scan ultrasonography showing a dome shaped choroidal lesion with high internal reflectivity. D, Postoperative B scan ultrasonography showing reduction in lesion height and base diameter after brachytherapy. E, Preoperative optical coherence tomography (OCT) line scan passing through the fovea showing significant subfoveal fluid. F, Postoperative OCT line scan passing through the fovea showing resolution of the subretinal fluid after brachytherapy.
